# Supplementary material for: Association of Melanoma-Risk Variants with Primary Melanoma Tumor Prognostic Characteristics and Melanoma-Specific Survival in the GEM Study
Source: MDPI journal article supplement (doi:10.3390/curroncol28060401), 2021-11-16
Supplement: s1 [file s1]

| Supplementary Table S1. Genotype locations, minor/major alleles, minor allele frequencies, numbers of samples genotyped in the GEM study, and references for the association of the genotypes with melanoma <sup>1</sup> |                   |                         |                       |     |      |               |                                            |                                           |                   |                                      |
|--------------------------------------------------------------------------------------------------------------------------------------------------------------------------------------------------------------------------|-------------------|-------------------------|-----------------------|-----|------|---------------|--------------------------------------------|-------------------------------------------|-------------------|--------------------------------------|
| Chromosome                                                                                                                                                                                                               | Gene neighborhood | SNP                     | Location <sup>2</sup> | a/A | MAF  | No. genotyped | No. higher-order primary melanoma aa/aA/AA | No. first-order primary melanoma aa/aA/AA | References        | RegulomeDB Rank / Score <sup>3</sup> |
| 1                                                                                                                                                                                                                        | ARNT              | rs7412746               | 150860471             | C/T | 0.44 | 3236          | 151/382/282                                | 491/1150/780                              | 1, 2, 3           | 6 / 0.16                             |
| 1                                                                                                                                                                                                                        | PARP1             | rs3219090               | 226564691             | A/G | 0.32 | 3198          | 71/356/383                                 | 243/1071/1074                             | 3, 4              | 7 / 0.18                             |
| 1                                                                                                                                                                                                                        | PARP1             | rs2695238               | 226604519             | C/G | 0.31 | 3250          | 72/357/392                                 | 237/1052/1140                             | 3                 | 5 / 0.62                             |
| 1                                                                                                                                                                                                                        | NID1              | rs3768080               | 236179869             | G/A | 0.48 | 3228          | 178/415/225                                | 576/1161/673                              | 5                 | 7 / 0.18                             |
| 1                                                                                                                                                                                                                        | NID1              | rs10754833              | 236184931             | C/T | 0.48 | 3236          | 184/409/223                                | 591/1162/667                              | 5                 | 3a / 0.55                            |
| 2                                                                                                                                                                                                                        | CASP8             | rs6735656 <sup>a</sup>  | 202124502             | G/T | 0.27 | 3213          | 61/329/422                                 | 171/925/1305                              | 6                 | 1f / 0.55                            |
| 2                                                                                                                                                                                                                        | CASP8             | rs13016963              | 202162811             | A/G | 0.38 | 3244          | 133/374/313                                | 364/1113/947                              | 6                 | 5 / 0.0                              |
| 5                                                                                                                                                                                                                        | TERT              | rs2242652               | 1280028               | T/C | 0.21 | 3103          | 41/258/498                                 | 94/754/1458                               | 7                 | 2b / 0.80                            |
| 5                                                                                                                                                                                                                        | TERT              | rs2853676               | 1288547               | A/G | 0.29 | 3244          | 76/329/418                                 | 229/944/1248                              | 7                 | 5 / 0.13                             |
| 5                                                                                                                                                                                                                        | TERT              | rs13356727              | 1312457               | G/A | 0.46 | 3262          | 188/421/213                                | 496/1193/751                              | 8                 | 4 / 0.61                             |
| 5                                                                                                                                                                                                                        | TERT;CLPTM1L      | rs4975616               | 1315660               | G/A | 0.48 | 3145          | 189/424/188                                | 502/1193/649                              | 8                 | 4 / 0.61                             |
| 5                                                                                                                                                                                                                        | TERT;CLPTM1L      | rs401681                | 1322087               | T/C | 0.48 | 3225          | 215/415/186                                | 539/1184/686                              | 6, 7, 8, 9        | 5 / 0.13                             |
| 5                                                                                                                                                                                                                        | SLC45A2           | rs16891982              | 33951693              | C/G | 0.02 | 3244          | 0/11/807                                   | 4/90/2332                                 | 1, 6, 10, 11, 12  | 4 / 0.61                             |
| 5                                                                                                                                                                                                                        | SLC45A2           | rs35391                 | 33955673              | T/C | 0.01 | 3222          | 0/4/806                                    | 2/59/2351                                 | 1, 11             | 7 / 0.18                             |
| 5                                                                                                                                                                                                                        | SLC45A2           | rs26722                 | 33963870              | T/C | 0.01 | 3210          | 0/7/805                                    | 1/56/2341                                 | 12                | 6 / 0.0                              |
| 5                                                                                                                                                                                                                        | SLC45A2           | rs13289                 | 33986409              | G/C | 0.37 | 3229          | 110/386/319                                | 328/1130/956                              | 13                | 3a / 0.98                            |
| 6                                                                                                                                                                                                                        | IRF4              | rs12203592              | 396321                | T/C | 0.23 | 3245          | 67/297/455                                 | 126/801/1499                              | 4, 14, 15, 16     | 2b / 0.62                            |
| 6                                                                                                                                                                                                                        | IRF4              | rs872071                | 411064                | A/G | 0.45 | 3220          | 157/408/248                                | 542/1114/751                              | 6, 14             | 4 / 0.61                             |
| 9                                                                                                                                                                                                                        | TYRP1             | rs1408799               | 12672097              | T/C | 0.30 | 3218          | 62/334/420                                 | 250/978/1174                              | 10, 11            | 5 / 1.0                              |
| 9                                                                                                                                                                                                                        | TYRP1             | rs2733832               | 12704725              | C/T | 0.40 | 3218          | 103/375/334                                | 408/1139/859                              | 11                | 3a / 0.55                            |
| 9                                                                                                                                                                                                                        | MTAP              | rs2218220               | 21756089              | T/C | 0.47 | 3241          | 191/396/234                                | 563/1167/690                              | 1, 10, 17         | 5 / 0.42                             |
| 9                                                                                                                                                                                                                        | MTAP              | rs1335510               | 21757803              | G/T | 0.37 | 3220          | 121/358/336                                | 376/1100/929                              | 1, 10, 17         | 1f / 0.55                            |
| 9                                                                                                                                                                                                                        | MTAP              | rs7023329               | 21816528              | G/A | 0.46 | 3216          | 176/393/245                                | 552/1125/725                              | 1, 10, 17, 18, 19 | 5 / 0.59                             |
| 9                                                                                                                                                                                                                        | MTAP              | rs10811629              | 21840298              | G/A | 0.39 | 3234          | 129/370/320                                | 410/1125/880                              | 17, 20            | 5 / 0.25                             |
| 11                                                                                                                                                                                                                       | CCND1             | rs11604821              | 69352137              | G/A | 0.36 | 3246          | 98/381/339                                 | 300/1130/998                              | 6                 | 5 / 0.13                             |
| 11                                                                                                                                                                                                                       | CCND1             | rs1485993               | 69362414              | T/C | 0.37 | 3228          | 113/379/325                                | 333/1131/947                              | 6                 | 5 / 0.48                             |
| 11                                                                                                                                                                                                                       | CCND1             | rs11263498              | 69382767              | T/C | 0.37 | 3235          | 106/382/325                                | 325/1147/950                              | 6                 | 4 / 0.61                             |
| 11                                                                                                                                                                                                                       | TYR               | rs1042602               | 88911696              | A/C | 0.35 | 3252          | 96/376/350                                 | 331/1103/996                              | 1                 | 5 / 0.13                             |
| 11                                                                                                                                                                                                                       | TYR               | rs10765198              | 88969774              | C/T | 0.34 | 3252          | 128/371/324                                | 283/1034/1112                             | 11                | 7 / 0.18                             |
| 11                                                                                                                                                                                                                       | TYR               | rs1847142               | 89021574              | A/G | 0.37 | 3246          | 140/385/296                                | 326/1068/1031                             | 1                 | 7 / 0.18                             |
| 11                                                                                                                                                                                                                       | TYR               | rs10830253              | 89028043              | G/T | 0.37 | 3222          | 142/381/295                                | 325/1052/1027                             | 1                 | 5 / 0.13                             |
| 11                                                                                                                                                                                                                       | ATM               | rs12278954 <sup>b</sup> | 108328952             | A/C | 0.14 | 3251          | 22/170/629                                 | 62/573/1795                               | 6                 | 5 / 0.13                             |
| 15                                                                                                                                                                                                                       | OCA2              | rs1800407               | 28230318              | A/G | 0.09 | 3249          | 14/151/654                                 | 20/381/2029                               | 11                | 5 / 0.13                             |
| 15                                                                                                                                                                                                                       | OCA2              | rs1800401               | 28260053              | T/C | 0.05 | 3259          | 2/81/741                                   | 8/215/2212                                | 21                | 4 / 0.61                             |
| 15                                                                                                                                                                                                                       | HERC2             | rs1129038               | 28356859              | G/A | 0.23 | 3225          | 42/271/502                                 | 139/847/1424                              | 1, 2              | 5 / 0.13                             |
| 15                                                                                                                                                                                                                       | HERC2             | rs12913832              | 28365618              | A/G | 0.23 | 3250          | 42/274/504                                 | 143/849/1438                              | 1, 2              | 5 / 0.63                             |
| 20                                                                                                                                                                                                                       | ASIP              | rs17305657              | 31806588              | C/T | 0.11 | 3237          | 13/175/631                                 | 25/434/1959                               | 6, 22             | 6 / 0.27                             |
| 20                                                                                                                                                                                                                       | ASIP              | rs4911414               | 32729444              | T/G | 0.38 | 3248          | 126/417/278                                | 331/1117/979                              | 6                 | 5 / 0.59                             |
| 20                                                                                                                                                                                                                       | PIGU              | rs910873                | 33171772              | A/G | 0.12 | 3256          | 16/203/605                                 | 27/514/1891                               | 1, 10, 22, 23     | 1f / 0.55                            |
| 20                                                                                                                                                                                                                       | PIGU              | rs17305573              | 33180152              | C/T | 0.12 | 2904          | 14/178/568                                 | 24/426/1694                               | 1, 18             | 5 / 0.80                             |
| 20                                                                                                                                                                                                                       | NCOA6             | rs4911442               | 33355046              | G/A | 0.16 | 3213          | 29/244/540                                 | 54/605/1741                               | 1, 2, 6, 18, 22   | 7 / 0.18                             |
| 20                                                                                                                                                                                                                       | MYH7B             | rs1885120               | 33576989              | C/G | 0.11 | 3236          | 14/179/625                                 | 23/468/1927                               | 1, 10, 23         | 1f / 0.55                            |
| 20                                                                                                                                                                                                                       | LOC647979         | rs1204552               | 34638903              | A/T | 0.09 | 3158          | 8/155/638                                  | 15/381/1961                               | 10                | 4 / 0.61                             |
| 21                                                                                                                                                                                                                       | MX2               | rs45430                 | 42746081              | G/A | 0.36 | 3240          | 95/375/348                                 | 333/1139/950                              | 6                 | 2b / 0.39                            |
| 22                                                                                                                                                                                                                       | PLA2G6            | rs6001027               | 38545619              | G/A | 0.34 | 3061          | 102/350/327                                | 270/1003/1009                             | 1, 17, 18         | 4 / 0.61                             |
| 22                                                                                                                                                                                                                       | PLA2G6            | rs132985                | 238563471             | T/C | 0.45 | 3242          | 161/401/257                                | 489/1200/734                              | 2, 17             | 5 / 0.13                             |
| 22                                                                                                                                                                                                                       | PLA2G6            | rs738322                | 238569006             | G/A | 0.45 | 3230          | 163/400/254                                | 498/1198/717                              | 17                | 4 / 0.61                             |

Abbreviations: GEM, Genes, Environment and Melanoma; SNP, single nucleotide polymorphism; a, minor allele; A, major allele; MAF, minor allele frequency for all participants; No., number.

<sup>1</sup>Limited to individuals of European origin with incident invasive first- or higher-order primary melanoma.

<sup>2</sup>Location is determined using hg19.

<sup>3</sup>Accessed from RegulomeDB (<https://regulomedb.org/>).

<sup>a</sup>rs6735656 is a proxy for rs10931936 ( $r^2=0.965$ ).

<sup>b</sup>rs12278954 is a proxy for rs1801516 ( $r^2=1.00$ ).

#### REFERENCES

1. Amos CI, Wang LE, Lee JE, et al. Genome-wide association study identifies novel loci predisposing to cutaneous melanoma. *Hum Mol Genet.* Dec 15 2011;20(24):5012-23. doi:10.1093/hmg/ddr415
2. Fang S, Han J, Zhang M, et al. Joint effect of multiple common SNPs predicts melanoma susceptibility. *PLoS One.* 2013;8(12):e85642. doi:10.1371/journal.pone.0085642
3. Macgregor S, Montgomery GW, Liu JZ, et al. Genome-wide association study identifies a new melanoma susceptibility locus at 1q21.3. *Nat Genet.* Oct 9 2011;43(11):1114-8. doi:10.1038/ng.958
4. Peña-Chilet M, Blanquer-Maceiras M, Ibarrola-Villava M, et al. Genetic variants in PARP1 (rs3219090) and IRF4 (rs12203592) genes associated with melanoma susceptibility in a Spanish population. *BMC Cancer.* Mar 27 2013;13:160. doi:10.1186/1471-2407-13-160
5. Nan H, Xu M, Zhang J, et al. Genome-wide association study identifies nidogen 1 (NID1) as a susceptibility locus to cutaneous nevi and melanoma risk. *Hum Mol Genet.* Jul 1 2011;20(13):2673-9. doi:10.1093/hmg/ddr154
6. Barrett JH, Iles MM, Harland M, et al. Genome-wide association study identifies three new melanoma susceptibility loci. *Nat Genet.* Oct 9 2011;43(11):1108-13. doi:10.1038/ng.959
7. Nan H, Qureshi AA, Prescott J, De Vivo I, Han J. Genetic variants in telomere-maintaining genes and skin cancer risk. *Hum Genet.* Mar 2011;129(3):247-53. doi:10.1007/s00439-010-0921-5
8. Law MH, Montgomery GW, Brown KM, et al. Meta-analysis combining new and existing data sets confirms that the TERT-CLPTM1L locus influences melanoma risk. *J Invest Dermatol.* Feb 2012;132(2):485-7. doi:10.1038/jid.2011.322
9. Rafnar T, Sulem P, Stacey SN, et al. Sequence variants at the TERT-CLPTM1L locus associate with many cancer types. *Nat Genet.* Feb 2009;41(2):221-7. doi:10.1038/ng.296
10. Chatzinasiou F, Lill CM, Kypreou K, et al. Comprehensive field synopsis and systematic meta-analyses of genetic association studies in cutaneous melanoma. *J Natl Cancer Inst.* Aug 17 2011;103(16):1227-35. doi:10.1093/jnci/djr219
11. Duffy DL, Zhao ZZ, Sturm RA, Hayward NK, Martin NG, Montgomery GW. Multiple pigmentation gene polymorphisms account for a substantial proportion of risk of cutaneous malignant melanoma. *J Invest Dermatol.* Feb 2010;130(2):520-8. doi:10.1038/jid.2009.258
12. Guedj M, Bourillon A, Combadières C, et al. Variants of the MATP/SLC45A2 gene are protective for melanoma in the French population. *Hum Mutat.* Sep 2008;29(9):1154-60. doi:10.1002/humu.20823
13. Nan H, Kraft P, Hunter DJ, Han J. Genetic variants in pigmentation genes, pigmentary phenotypes, and risk of skin cancer in Caucasians. *Int J Cancer.* Aug 15 2009;125(4):909-17. doi:10.1002/ijc.24327
14. Duffy DL, Iles MM, Glass D, et al. IRF4 variants have age-specific effects on nevus count and predispose to melanoma. *Am J Hum Genet.* Jul 9 2010;87(1):6-16. doi:10.1016/j.ajhg.2010.05.017
15. Han J, Qureshi AA, Nan H, et al. A germline variant in the interferon regulatory factor 4 gene as a novel skin cancer risk locus. *Cancer Res.* Mar 1 2011;71(5):1533-9. doi:10.1158/0008-5472.Can-10-1818
16. Zhang M, Song F, Liang L, et al. Genome-wide association studies identify several new loci associated with pigmentation traits and skin cancer risk in European Americans. *Hum Mol Genet.* Jul 15 2013;22(14):2948-59. doi:10.1093/hmg/ddt142
17. Falchi M, Bataille V, Hayward NK, et al. Genome-wide association study identifies variants at 9p21 and 22q13 associated with development of cutaneous nevi. *Nat Genet.* Aug 2009;41(8):915-9. doi:10.1038/ng.410
18. Bishop DT, Dumenais F, Iles MM, et al. Genome-wide association study identifies three loci associated with melanoma risk. *Nat Genet.* Aug 2009;41(8):920-5. doi:10.1038/ng.411
19. Newton-Bishop JA, Chang YM, Iles MM, et al. Melanocytic nevi, nevus genes, and melanoma risk in a large case-control study in the United Kingdom. *Cancer Epidemiol Biomarkers Prev.* Aug 2010;19(8):2043-54. doi:10.1158/1055-9965.Epi-10-0233
20. Maccioni L, Rachakonda PS, Bermejo JL, et al. Variants at the 9p21 locus and melanoma risk. *BMC Cancer.* Jul 2 2013;13:325. doi:10.1186/1471-2407-13-325
21. Jannot AS, Meziani R, Bertrand G, et al. Allele variations in the OCA2 gene (pink-eyed-dilution locus) are associated with genetic susceptibility to melanoma. *Eur J Hum Genet.* Aug 2005;13(8):913-20. doi:10.1038/sj.ejhg.5201415
22. Brown KM, Macgregor S, Montgomery GW, et al. Common sequence variants on 20q11.22 confer melanoma susceptibility. *Nat Genet.* Jul 2008;40(7):838-40. doi:10.1038/ng.163
23. Nan H, Qureshi AA, Han J. Melanoma susceptibility variants on chromosome 20q11.22 are associated with pigmentary traits and the risk of nonmelanoma skin cancer. *Br J Dermatol.* Feb 1 2010;162(2):461-3. doi:10.1111/j.1365-2133.2009.09579.x

| Supplementary Table S2. Number of GEM participants successfully genotyped for each SNP and distribution of these participants by prognostic characteristics of primary melanoma tumor <sup>1</sup> |                         |                       |              |              |              |              |       |               |              |        |              |              |        |              |              |            |              |              |              |          |  |       |  |
|----------------------------------------------------------------------------------------------------------------------------------------------------------------------------------------------------|-------------------------|-----------------------|--------------|--------------|--------------|--------------|-------|---------------|--------------|--------|--------------|--------------|--------|--------------|--------------|------------|--------------|--------------|--------------|----------|--|-------|--|
|                                                                                                                                                                                                    |                         | Breslow thickness, mm |              |              |              |              |       | Ulceration    |              |        | Mitoses      |              |        | TIL grade    |              |            |              |              |              |          |  |       |  |
|                                                                                                                                                                                                    |                         | 0.01-1.00             |              | 1.01-2.00    |              | 2.01-4.00    |       | >4.00         |              | Absent |              | Present      |        | Absent       |              | Present    |              | Absent       |              | Nonbrisk |  | Brisk |  |
| Gene neighborhood                                                                                                                                                                                  | SNP                     | a/A                   | No. aa/aA/AA | No. aa/aA/AA | No. aa/aA/AA | No. aa/aA/AA | Total | No. aa/aA/AA  | No. aa/aA/AA | Total  | No. aa/aA/AA | No. aa/aA/AA | Total  | No. aa/aA/AA | No. aa/aA/AA | Total      | No. aa/aA/AA | No. aa/aA/AA | No. aa/aA/AA | Total    |  |       |  |
| ARNT                                                                                                                                                                                               | rs7412746               | C/T                   | 428/1023/713 | 122/264/194  | 55/134/85    | 26/69/46     | 3159  | 47/11100/788  | 48/102/71    | 2580   | 293/703/523  | 226/507/336  | 2588   | 127/257/181  | 317/762/552  | 70/184/123 | 2573         |              |              |          |  |       |  |
| PARP1                                                                                                                                                                                              | rs3219090               | A/G                   | 208/968/960  | 52/248/284   | 26/126/116   | 22/51/65     | 3126  | 226/1053/1052 | 26/87/107    | 2551   | 142/690/665  | 110/454/498  | 2559   | 49/242/260   | 163/727/725  | 38/170/170 | 2544         |              |              |          |  |       |  |
| PARP1                                                                                                                                                                                              | rs2695238               | C/G                   | 198/966/1009 | 52/237/294   | 28/119/127   | 23/52/67     | 3172  | 221/1039/1106 | 27/82/114    | 2589   | 139/683/707  | 109/441/518  | 2597   | 51/243/270   | 159/711/768  | 36/165/179 | 2582         |              |              |          |  |       |  |
| NID1                                                                                                                                                                                               | rs3768080               | G/A                   | 528/1039/588 | 118/301/161  | 59/138/77    | 35/64/43     | 3151  | 564/1164/621  | 42/112/66    | 2569   | 377/745/392  | 231/535/297  | 2577   | 137/282/142  | 378/799/447  | 89/192/96  | 2562         |              |              |          |  |       |  |
| NID1                                                                                                                                                                                               | rs10754833              | C/T                   | 546/1033/585 | 118/301/160  | 60/138/75    | 37/63/42     | 3158  | 579/1160/618  | 43/113/65    | 2578   | 390/741/392  | 233/537/293  | 2586   | 140/282/140  | 394/791/445  | 86/197/96  | 2571         |              |              |          |  |       |  |
| CASP8                                                                                                                                                                                              | rs6735656 <sup>a</sup>  | G/T                   | 156/846/1143 | 48/230/300   | 11/105/155   | 10/42/89     | 3135  | 178/906/1263  | 14/84/121    | 2566   | 116/591/804  | 76/403/584   | 2574   | 50/204/306   | 115/640/867  | 25/147/205 | 2559         |              |              |          |  |       |  |
| CASP8                                                                                                                                                                                              | rs13016963              | A/G                   | 341/1003/827 | 89/272/221   | 30/129/114   | 25/49/68     | 3168  | 365/1062/934  | 32/107/83    | 2583   | 251/687/588  | 147/484/434  | 2591   | 90/248/225   | 245/742/645  | 61/177/143 | 2576         |              |              |          |  |       |  |
| TERT                                                                                                                                                                                               | rs2242652               | T/C                   | 92/687/1297  | 21/167/363   | 7/90/163     | 7/44/88      | 3026  | 100/728/1423  | 9/67/134     | 2461   | 72/497/885   | 37/301/677   | 2469   | 23/163/351   | 74/517/957   | 12/116/241 | 2454         |              |              |          |  |       |  |
| TERT                                                                                                                                                                                               | rs2853676               | A/G                   | 200/869/1101 | 51/233/300   | 29/107/138   | 16/40/84     | 3168  | 214/944/1206  | 24/75/123    | 2586   | 154/610/759  | 86/411/574   | 2594   | 49/236/279   | 150/633/851  | 41/147/193 | 2579         |              |              |          |  |       |  |
| TERT                                                                                                                                                                                               | rs13356727              | G/A                   | 477/1082/621 | 110/278/201  | 56/134/83    | 27/77/38     | 3184  | 509/1161/706  | 41/114/69    | 2600   | 342/746/441  | 211/533/335  | 2608   | 130/270/165  | 333/822/489  | 87/183/114 | 2593         |              |              |          |  |       |  |
| TERT:CLPTM1L                                                                                                                                                                                       | rs4975616               | G/A                   | 480/1079/550 | 114/282/166  | 55/136/69    | 29/77/32     | 3069  | 512/1160/618  | 42/117/48    | 2497   | 347/742/389  | 210/539/278  | 2505   | 130/274/144  | 333/818/431  | 91/185/84  | 2490         |              |              |          |  |       |  |
| TERT:CLPTM1L                                                                                                                                                                                       | rs401681                | T/C                   | 532/1070/555 | 119/280/177  | 59/131/83    | 29/75/38     | 3148  | 564/1141/642  | 43/118/59    | 2567   | 383/737/394  | 227/526/308  | 2575   | 133/271/154  | 374/804/445  | 99/185/95  | 2560         |              |              |          |  |       |  |
| SLC45A2                                                                                                                                                                                            | rs16891982              | C/G                   | 1/67/2098    | 1/19/563     | 0/9/266      | 2/1/140      | 3167  | 3/72/2283     | 1/6/217      | 2582   | 2/52/1466    | 2/26/1042    | 2590   | 2/23/533     | 1/45/1591    | 1/9/370    | 2575         |              |              |          |  |       |  |
| SLC45A2                                                                                                                                                                                            | rs35391                 | T/C                   | 1/37/2114    | 0/17/564     | 0/5/266      | 1/2/138      | 3145  | 1/45/2294     | 1/4/218      | 2563   | 1/30/1477    | 1/19/1043    | 2571   | 1/13/540     | 1/31/1592    | 0/5/373    | 2556         |              |              |          |  |       |  |
| SLC45A2                                                                                                                                                                                            | rs26722                 | T/C                   | 0/40/2107    | 0/13/564     | 0/4/265      | 0/3/136      | 3132  | 0/47/2286     | 0/5/212      | 2550   | 0/32/1474    | 0/20/1032    | 2558   | 0/13/539     | 0/34/1583    | 0/5/370    | 2544         |              |              |          |  |       |  |
| SLC45A2                                                                                                                                                                                            | rs13289                 | G/C                   | 288/993/881  | 74/282/221   | 45/141/84    | 20/6/161     | 3151  | 327/1096/928  | 38/99/85     | 2573   | 208/699/614  | 157/502/401  | 2581   | 93/275/194   | 215/755/655  | 54/166/159 | 2566         |              |              |          |  |       |  |
| IRF4                                                                                                                                                                                               | rs12203592              | T/C                   | 112/713/1341 | 38/190/356   | 21/118/135   | 15/50/78     | 3167  | 143/803/1417  | 15/92/114    | 2584   | 86/514/924   | 72/383/613   | 2592   | 39/198/328   | 98/537/999   | 21/159/198 | 2577         |              |              |          |  |       |  |
| IRF4                                                                                                                                                                                               | rs872071                | A/G                   | 470/1004/680 | 126/287/164  | 65/118/90    | 25/69/45     | 3143  | 502/1124/721  | 45/102/74    | 2568   | 310/729/474  | 237/500/326  | 2576   | 113/276/166  | 365/747/517  | 65/198/114 | 2561         |              |              |          |  |       |  |
| TYRP1                                                                                                                                                                                              | rs1408799               | T/C                   | 199/868/1081 | 60/239/279   | 32/118/122   | 13/54/75     | 3140  | 205/962/1176  | 32/84/103    | 2562   | 132/603/775  | 106/446/508  | 2570   | 43/237/279   | 154/659/805  | 40/149/189 | 2555         |              |              |          |  |       |  |
| TYRP1                                                                                                                                                                                              | rs2733832               | C/T                   | 330/1000/823 | 99/285/193   | 51/122/97    | 20/67/53     | 3140  | 359/1106/876  | 39/101/80    | 2561   | 223/699/584  | 175/513/375  | 2569   | 80/266/212   | 261/758/598  | 56/118/143 | 2554         |              |              |          |  |       |  |
| MTAP                                                                                                                                                                                               | rs2218220               | T/C                   | 522/1027/615 | 111/282/190  | 61/154/59    | 35/69/38     | 3163  | 547/1144/667  | 46/114/62    | 2580   | 345/749/425  | 250/513/306  | 2588   | 108/280/172  | 390/778/465  | 92/198/90  | 2573         |              |              |          |  |       |  |
| MTAP                                                                                                                                                                                               | rs1335510               | G/T                   | 349/963/840  | 67/261/252   | 43/136/92    | 24/64/53     | 3144  | 375/1063/907  | 26/106/88    | 2565   | 237/689/586  | 165/484/412  | 2573   | 75/242/242   | 264/739/618  | 61/184/133 | 2558         |              |              |          |  |       |  |
| MTAP                                                                                                                                                                                               | rs7023329               | G/A                   | 502/985/659  | 108/289/185  | 59/145/67    | 35/68/37     | 3139  | 527/1115/701  | 39/122/58    | 2562   | 333/735/439  | 236/506/321  | 2570   | 114/264/181  | 370/767/483  | 80/203/93  | 2555         |              |              |          |  |       |  |
| MTAP                                                                                                                                                                                               | rs10811629              | G/A                   | 371/985/800  | 84/258/243   | 39/147/87    | 29/66/47     | 3156  | 401/1077/877  | 31/112/78    | 2576   | 249/698/568  | 184/494/391  | 2584   | 85/254/224   | 283/746/598  | 64/184/131 | 2569         |              |              |          |  |       |  |
| CCND1                                                                                                                                                                                              | rs11604821              | G/A                   | 267/1035/867 | 76/267/242   | 21/114/138   | 20/60/62     | 3169  | 278/1105/982  | 25/102/94    | 2586   | 177/750/596  | 127/458/486  | 2594   | 66/267/229   | 191/748/699  | 46/187/146 | 2579         |              |              |          |  |       |  |
| CCND1                                                                                                                                                                                              | rs1485993               | T/C                   | 307/1033/821 | 84/263/236   | 20/115/131   | 19/65/57     | 3151  | 320/1092/938  | 29/106/88    | 2573   | 210/732/576  | 140/467/456  | 2581   | 74/257/226   | 221/746/663  | 53/191/135 | 2566         |              |              |          |  |       |  |
| CCND1                                                                                                                                                                                              | rs11263498              | T/C                   | 293/1040/826 | 77/272/235   | 25/118/132   | 20/64/56     | 3158  | 310/1109/936  | 27/105/91    | 2578   | 201/741/572  | 137/474/461  | 2586   | 73/264/225   | 210/755/665  | 53/190/136 | 2571         |              |              |          |  |       |  |
| TYR**                                                                                                                                                                                              | rs1042602               | A/C                   | 282/1011/882 | 87/242/253   | 33/119/122   | 16/73/54     | 3174  | 298/1071/997  | 25/114/84    | 2589   | 200/697/630  | 123/492/455  | 2597   | 71/240/254   | 195/776/667  | 55/166/158 | 2582         |              |              |          |  |       |  |
| TYR                                                                                                                                                                                                | rs10765198              | C/T                   | 266/950/956  | 76/238/274   | 40/124/110   | 15/66/59     | 3174  | 308/1035/1025 | 27/92/102    | 2589   | 181/669/676  | 154/463/454  | 2597   | 72/250/242   | 207/728/704  | 55/150/174 | 2582         |              |              |          |  |       |  |
| TYR                                                                                                                                                                                                | rs1847142               | A/G                   | 302/988/879  | 84/243/256   | 45/126/104   | 20/67/54     | 3168  | 345/1068/950  | 33/100/90    | 2586   | 210/697/619  | 168/477/423  | 2594   | 85/258/220   | 232/755/649  | 60/156/164 | 2579         |              |              |          |  |       |  |
| TYR                                                                                                                                                                                                | rs10830253              | G/T                   | 304/975/874  | 83/241/254   | 45/123/104   | 20/66/55     | 3144  | 346/1056/942  | 32/98/89     | 2563   | 211/688/613  | 167/472/420  | 2571   | 86/257/216   | 232/744/645  | 59/154/163 | 2556         |              |              |          |  |       |  |
| ATM                                                                                                                                                                                                | rs12278954 <sup>b</sup> | A/C                   | 59/491/1624  | 17/128/441   | 5/67/200     | 2/38/102     | 3174  | 60/537/1769   | 7/50/166     | 2589   | 40/354/1130  | 27/235/811   | 2597   | 13/131/402   | 41/375/1219  | 13/80/290  | 2582         |              |              |          |  |       |  |
| OCA2                                                                                                                                                                                               | rs1800407               | A/G                   | 21/371/1782  | 7/90/487     | 3/33/237     | 3/21/117     | 3172  | 26/382/1960   | 3/33/186     | 2590   | 14/264/1253  | 15/151/901   | 2598   | 10/91/463    | 14/257/1369  | 5/67/307   | 2583         |              |              |          |  |       |  |
| OCA2                                                                                                                                                                                               | rs1800401               | T/C                   | 5/203/1970   | 5/46/536     | 0/29/246     | 0/14/128     | 3182  | 7/213/2154    | 1/20/202     | 2597   | 6/131/1395   | 2/102/969    | 2605   | 0/47/519     | 6/151/1487   | 2/33/345   | 2590         |              |              |          |  |       |  |
| HERC2                                                                                                                                                                                              | rs1129038               | G/A                   | 113/749/1298 | 33/202/340   | 17/98/156    | 13/41/88     | 3148  | 115/800/1437  | 17/68/133    | 2570   | 75/529/914   | 60/342/658   | 2578   | 29/193/337   | 83/560/982   | 19/116/244 | 2563         |              |              |          |  |       |  |
| HERC2                                                                                                                                                                                              | rs12913832              | A/G                   | 112/757/1302 | 36/201/347   | 17/100/158   | 14/39/89     | 3172  | 117/804/1446  | 17/69/137    | 2590   | 76/534/918   | 61/342/667   | 2598   | 27/196/340   | 87/562/991   | 19/116/245 | 2583         |              |              |          |  |       |  |
| ASIP                                                                                                                                                                                               | rs17305657              | C/T                   | 25/421/1714  | 8/96/479     | 2/52/220     | 2/23/117     | 3159  | 26/449/1879   | 1/35/184     | 2574   | 16/302/1196  | 11/182/875   | 2582   | 4/101/457    | 17/300/1311  | 6/81/290   | 2567         |              |              |          |  |       |  |
| ASIP                                                                                                                                                                                               | rs4911414               | T/G                   | 315/1020/832 | 74/292/221   | 39/125/110   | 15/67/61     | 3171  | 330/1130/905  | 35/101/88    | 2589   | 230/732/565  | 136/502/432  | 2597   | 74/271/220   | 231/785/621  | 60/172/148 | 2582         |              |              |          |  |       |  |
| PIGU                                                                                                                                                                                               | rs910873                | A/G                   | 33/485/1656  | 3/124/461    | 5/62/208     | 1/28/112     | 3178  | 28/544/1800   | 3/39/181     | 2595   | 19/364/1147  | 13/220/840   | 2603   | 6/120/440    | 21/367/1253  | 5/94/282   | 2588         |              |              |          |  |       |  |
| PIGU                                                                                                                                                                                               | rs17305573              | C/T                   | 27/410/1501  | 4/99/418     | 5/52/180     | 1/25/107     | 2829  | 25/456/1631   | 2/31/162     | 2307   | 18/304/1043  | 10/184/757   | 2316   | 5/101/394    | 18/309/1139  | 5/75/254   | 2300         |              |              |          |  |       |  |
| NCOA6                                                                                                                                                                                              | rs4911442               | G/A                   | 65/582/1503  | 5/136/435    | 9/75/186     | 3/35/103     | 3137  | 55/639/1642   | 5/50/166     | 2557   | 40/421/1048  | 21/268/767   | 2565   | 12/139/404   | 40/441/1138  | 9/106/261  | 2550         |              |              |          |  |       |  |
| MYH7B                                                                                                                                                                                              | rs1885120               | C/G                   | 28/445/1690  | 2/111/470    | 5/55/211     | 1/20/120     | 3158  | 24/496/1835   | 2/30/188     | 2575   | 18/326/1173  | 9/201/856    | 2583</ |              |              |            |              |              |              |          |  |       |  |
